# Supplementary material
Source: ML conference proceedings conference paper supplement (https://openaccess.thecvf.com/content/cvpr_2015/html/Hattori_Learning_Scene-Specific_Pedestrian_2015_CVPR_paper.html)
Supplement: Supplementary file 3 [file Hattori_Learning_Scene-Specific_Pedestrian_2015_CVPR_supplemental.zip]

Archive with 5 entries (4 files):
- 0168_supp.mp4
- __MACOSX/
- __MACOSX/._0168_supp.mp4
- 0168_supp.pdf
- __MACOSX/._0168_supp.pdf
